# Supplementary material for: Network Controllability-Based Prioritization of Candidates for SARS-CoV-2 Drug Repositioning
Source: Viruses. 2020 Sep 26;12(10):1087. doi: 10.3390/v12101087 (PMC7650805; doi:10.3390/v12101087)
Supplement: Supplementary file 1 [file viruses-12-01087-s001.xlsx]

## Sheet: Sheet1
Compound Name	Target Gene	Drug Status	Identified by Drugbank/research associations	Identified in Gordon et al (2020) (**active viral inhibition, *untested)
Ternatin 4 (DA3)	EIF4AE	Pre-clinical		X**
Zotatifin (eFT226)	EIF4AE	Clinical Trial		X**
4E2RCat	EIF4AE	Pre-clinical		X
4E1Rcat	EIF4AE	Pre-clinical		X
7-methyl-GpppA	EIF4AE	Experimental	X
7-methyl-7,8-dihydroguanosine-5'-diphosphate	EIF4AE	Experimental	X
7-methyl-guanosine-5'-triphosphate	EIF4AE	Experimental	X
LY2275796	EIF4AE	Investigational	X
S-[(1-Hydroxy-2,2,5,5-tetramethyl-2,5-dihydro-1H-pyrrol-3-yl)methyl] methanesulfonothioate	EIF4AE	Experimental	X
Rapamycin (Sirolimus)	EIF4AE, LARP1	Approved	X	X
Mycophenolic acid	IMPDH2	Approved	X	X**
Ribavirin	IMPDH2	Approved	X	X
Merimepodib	IMPDH2	Clinical Trial		X
Mycophenolate mofetil	IMPDH2	Approved	X
NADH	IMPDH2	Approved	X
Selenazole-4-carboxyamide-adenine dinucleotide	IMPDH2	Experimental	X
6-Chloropurine Riboside, 5'-Monophosphate	IMPDH2	Experimental	X
Inosinic Acid	IMPDH2	Experimental	X
VX-148	IMPDH2	Investigational	X
Azathioprine	IMPDH2	Approved	X
RapaLink-1	LARP1	Pre-clinical		X
Sapanisertib (INK128/MlN128)	LARP1	Clinical Trial		X
Selinexor	NUP210/RAE1	Approved		X*
Myristic acid	PVR	Experimental	X
Sphingosine	PVR	Experimental	X
Phosphatidyl serine	SCARB1	Approved	X
Tocopherol	SCARB1	Approved	X
alpha-Tocopherol acetate	SCARB1	Approved	X
Tocofersolan	SCARB1	Approved	X
Vitamin E	SCARB1	Approved	X
PHA-665752	SCARB1, NUP210	Experimental	X
E-52862	SIGMAR1	Clinical Trial		X
RS-PPCC	SIGMAR1	Pre-clinical		X
PD-144418	SIGMAR1	Pre-clinical		X**
Dextromethorphan	SIGMAR1	Approved	X	X
Haloperidol	SIGMAR1	Approved	X	X**
PB28	SIGMAR1	Pre-clinical		X**
Siramesine	SIGMAR1	Clinical Trial		X**
Cloperastine	SIGMAR1	Approved		X**
BD1008	SIGMAR1	Pre-clinical		X
Carbapentane	SIGMAR1	Approved		X
Ifenprodil	SIGMAR1	Approved		X
Progesterone	SIGMAR1	Approved		X
Clemastine	SIGMAR1	Approved		X**
Hydroxychloroquine	SIGMAR1	Approved		X**
Olanzapine	SIGMAR1	Approved		X
Pimozide	SIGMAR1	Approved		X
Rimcazole	SIGMAR1	Pre-clinical		X
Phencyclidine	SIGMAR1	Illicit	X
Noscapine	SIGMAR1	Approved	X
Pentazocine	SIGMAR1	Approved	X
Dimethyltryptamine	SIGMAR1	Experimental, illicit	X
Remoxipride	SIGMAR1	Approved	X
Amitriptyline	SIGMAR1	Approved	X
Prasterone	SIGMAR1	Approved	X
Captodiame	SIGMAR1	Experimental	X
Cocaine	SIGMAR1	Approved, illicit	X
Pentoxyverine	SIGMAR1	Approved	X
Hydrocodone	SIGMAR1	Approved, illicit, investigational	X
